# Supplementary material for: Transduction and Expansion of Primary T Cells in Nine Days with Maintenance of Central Memory Phenotype
Source: PubMed Central journal article supplement — J Vis Exp. Author manuscript; Available in PMC 2022 Aug 26. (PMC9411022; doi:10.3791/60400), 2020-03-18
Supplement: NIHMS1629253-supplement-1.pdf [file NIHMS1629253-supplement-1.pdf]

The free access video publication can be seen at:

<https://www.jove.com/v/60400/transduction-expansion-primary-t-cells-nine-days-with-maintenance>

For the publication:

Transduction and Expansion of Primary T Cells in Nine Days with Maintenance of Central Memory  
Phenotype Published: March 18, 2020 doi: 10.3791/60400
